# Supplementary material for: Esterase-responsive polymeric prodrug-based tumor targeting nanoparticles for improved anti-tumor performance against colon cancer
Source: Royal Society of Chemistry journal article supplement (doi:10.1039/c6ra05236c), 2016-01-01
Supplement: c6ra05236c1.pdf [file c6ra05236c1.pdf]

## Supporting Information

### **Esterase-Responsive Polymeric Prodrug-Based Tumor Targeting Nanoparticles for Improved Anti-Tumor Performance against Colon Cancer**

**Gang Pan<sup>1,#</sup>, Yi-jie Bao<sup>1,#</sup>, Jie Xu<sup>1,#</sup>, Tao Liu<sup>2</sup>, Cheng Liu<sup>2</sup>, Yan-yan Qiu<sup>2</sup>, Xiao-jing Shi<sup>1</sup>, Hui Yu<sup>1</sup>, Ting-ting Jia<sup>3</sup>, Xia Yuan<sup>3</sup>, Ze-ting Yuan<sup>2</sup>, Pei-hao Yin<sup>1,4\*</sup>, and Yi-jun Cao<sup>1,\*</sup>**

*<sup>1</sup>Department of General Surgery, Putuo Hospital, Shanghai University of Traditional Chinese Medicine, Shanghai, 200062, China*

*<sup>2</sup>Centralab, Putuo Hospital, Shanghai University of Traditional Chinese Medicine, Shanghai, 200062, China*

*<sup>3</sup>Department of Pharmacy, Putuo Hospital, Shanghai University of Traditional Chinese Medicine, Shanghai, 200062, China*

*<sup>4</sup>Interventional Cancer Institute of Chinese Integrative Medicine, Shanghai University of Traditional Chinese Medicine, Shanghai, 200062, China*

#These authors contributed equally to this work

\* To whom correspondence should be addressed. E-mail: yinpeihao1975@hotmail.com

caoyjxw@126.com

**Table S1.** Molecular parameters of polymers used in this study.

| Sample                                                                                                                                                                         | $M_n$ (g/mol) <sup>a</sup> | $D_M$ <sup>a</sup> | $M_n$ (g/mol) <sup>b</sup> |
|--------------------------------------------------------------------------------------------------------------------------------------------------------------------------------|----------------------------|--------------------|----------------------------|
| P(OEGMA <sub>0.45</sub> - <i>co</i> -BSMA <sub>0.55</sub> ) <sub>72</sub>                                                                                                      | 25,000                     | 1.29               | 24,800                     |
| P(OEGMA <sub>0.45</sub> - <i>co</i> -BUF <sub>0.46</sub> - <i>co</i> -NHS <sub>0.09</sub> ) <sub>72</sub>                                                                      | 37,700                     | 1.21               | 37,700                     |
| P(OEGMA <sub>0.45</sub> - <i>co</i> -BUF <sub>0.46</sub> - <i>co</i> -NHS <sub>0.062</sub> - <i>co</i> -RGD <sub>0.028</sub> ) <sub>72</sub>                                   | 38,900                     | 1.32               | 38,900                     |
| P(OEGMA <sub>0.45</sub> - <i>co</i> -BUF <sub>0.46</sub> - <i>co</i> -NHS <sub>0.048</sub> - <i>co</i> -RGD <sub>0.028</sub> - <i>co</i> -Cy5 <sub>0.014</sub> ) <sub>72</sub> | 39,000                     | 1.31               | 39,500                     |
| P(OEGMA <sub>0.45</sub> - <i>co</i> -BUF <sub>0.46</sub> - <i>co</i> -NHS <sub>0.076</sub> - <i>co</i> -Cy5 <sub>0.014</sub> ) <sub>72</sub>                                   | 39,100                     | 1.30               | 38,400                     |

<sup>a</sup> Determined by GPC using DMF as the eluent (1.0 mL/min). <sup>b</sup> Calculated from <sup>1</sup>H NMR results.

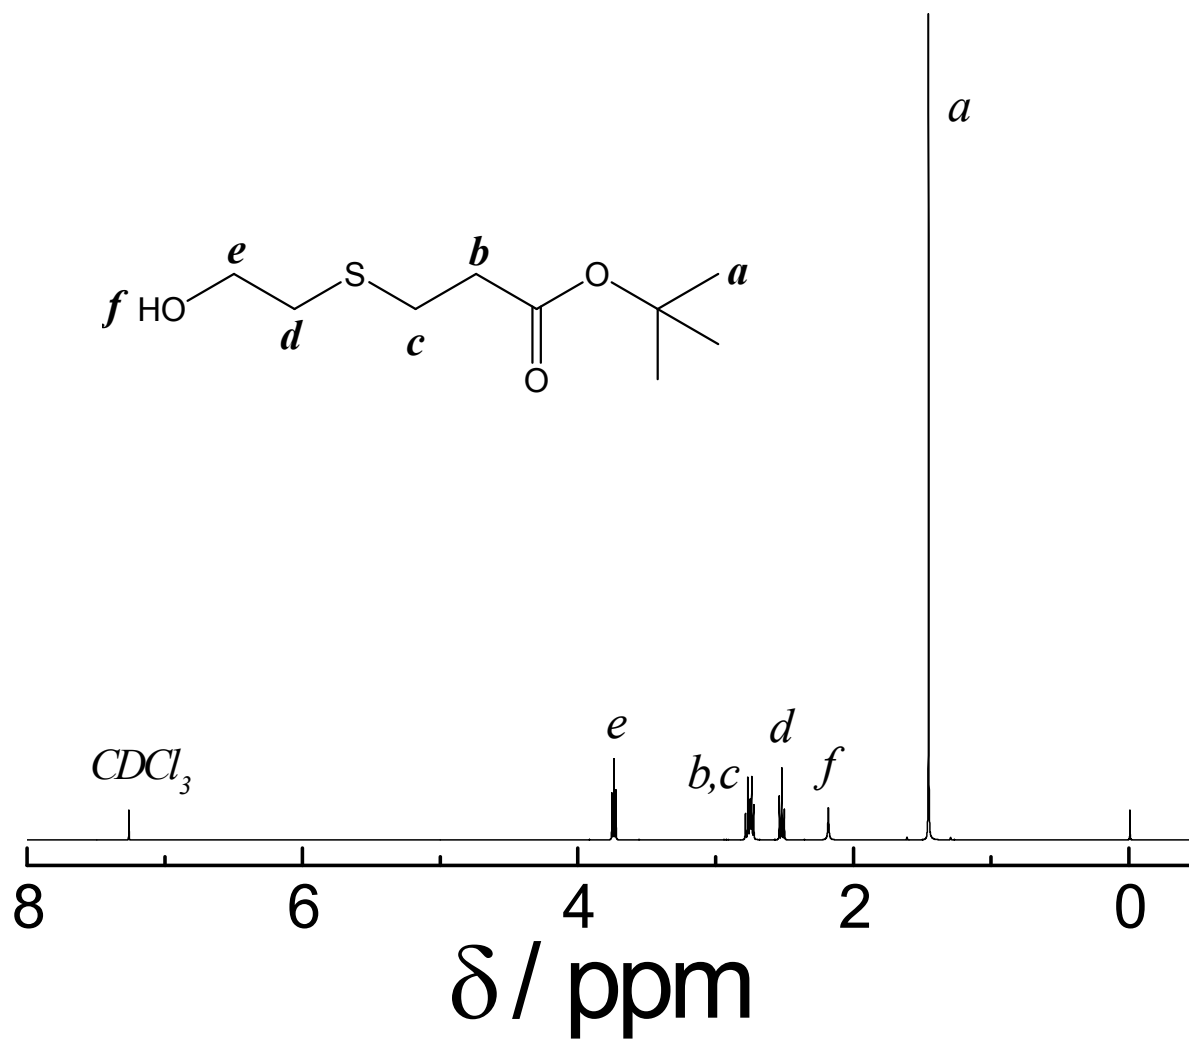

**Fig. S1.** <sup>1</sup>H NMR spectrum of *tert*-butyl-3-((2-hydroxyethyl)thio)propanoate in CDCl<sub>3</sub>.

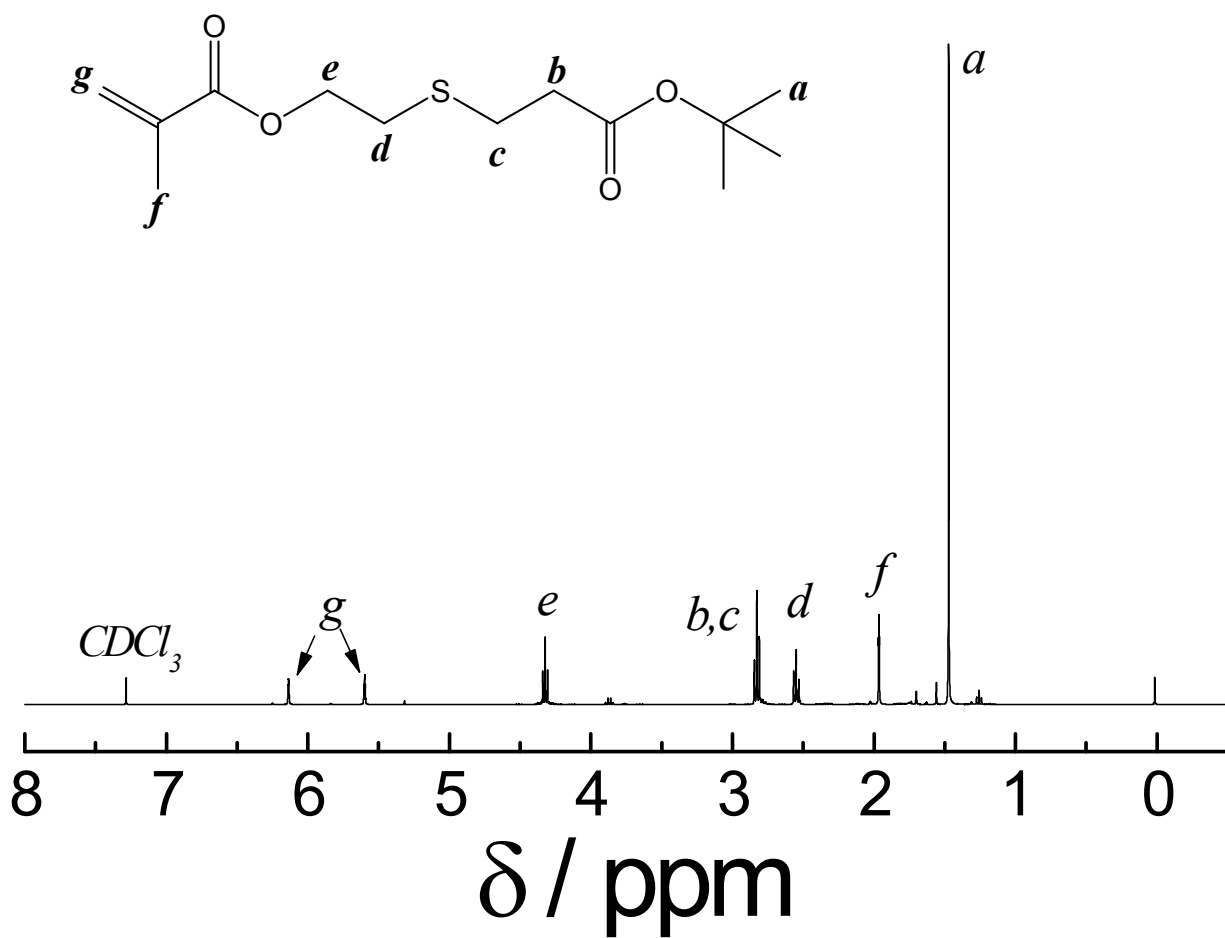

**Fig. S2.**  $^1\text{H}$  NMR spectrum of 2-((3-(*tert*-butoxy)-3-oxopropyl)thio)ethyl methacrylate in  $\text{CDCl}_3$ .

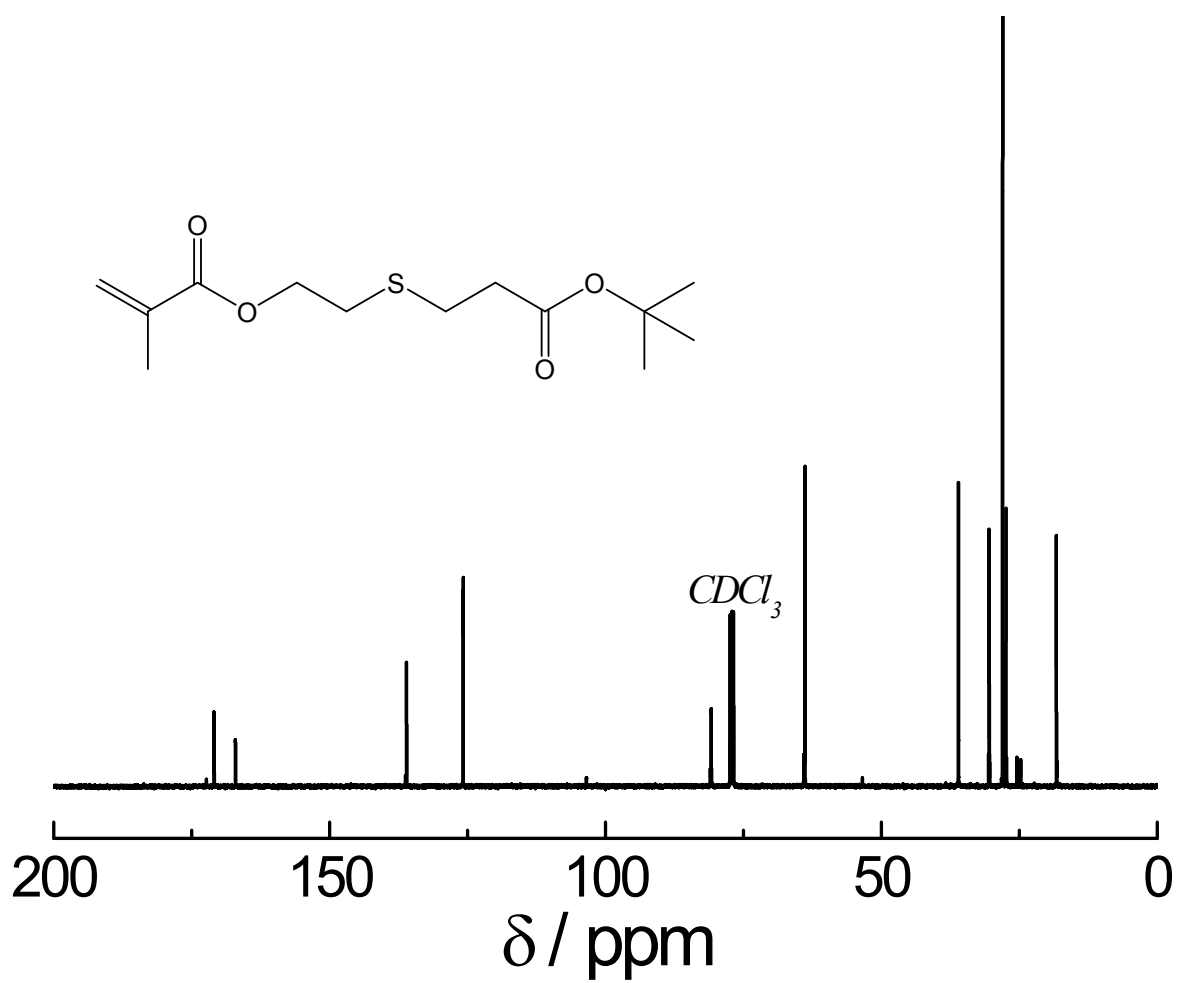

**Fig. S3.** <sup>13</sup>C NMR spectrum of 2-((3-(*tert*-butoxy)-3-oxopropyl)thio)ethyl methacrylate in CDCl<sub>3</sub>.

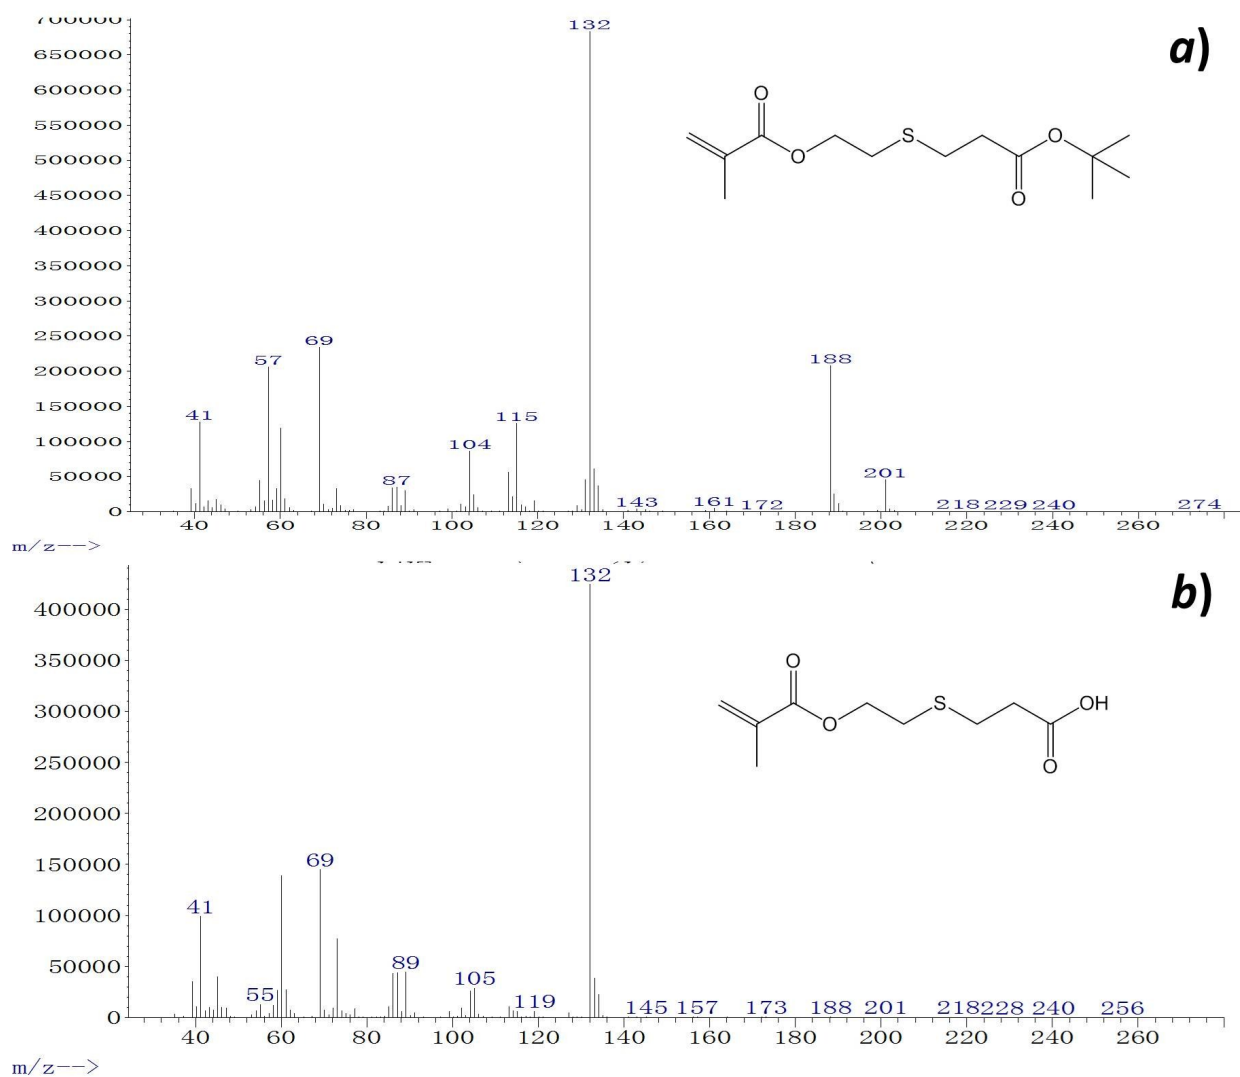

**Fig. S4.** ESI-Mass spectra of (a) 2-((3-(*tert*-butoxy)-3-oxopropyl)thio)ethyl methacrylate (m/z 188, calculated for  $C_9H_{10}O_2S$ : 188) and (b) 3-((2-(methacryloyloxy)ethyl)thio)propanoic acid (BSMA) (m/z 132, calculated for  $C_5H_8O_2S$ : 132).

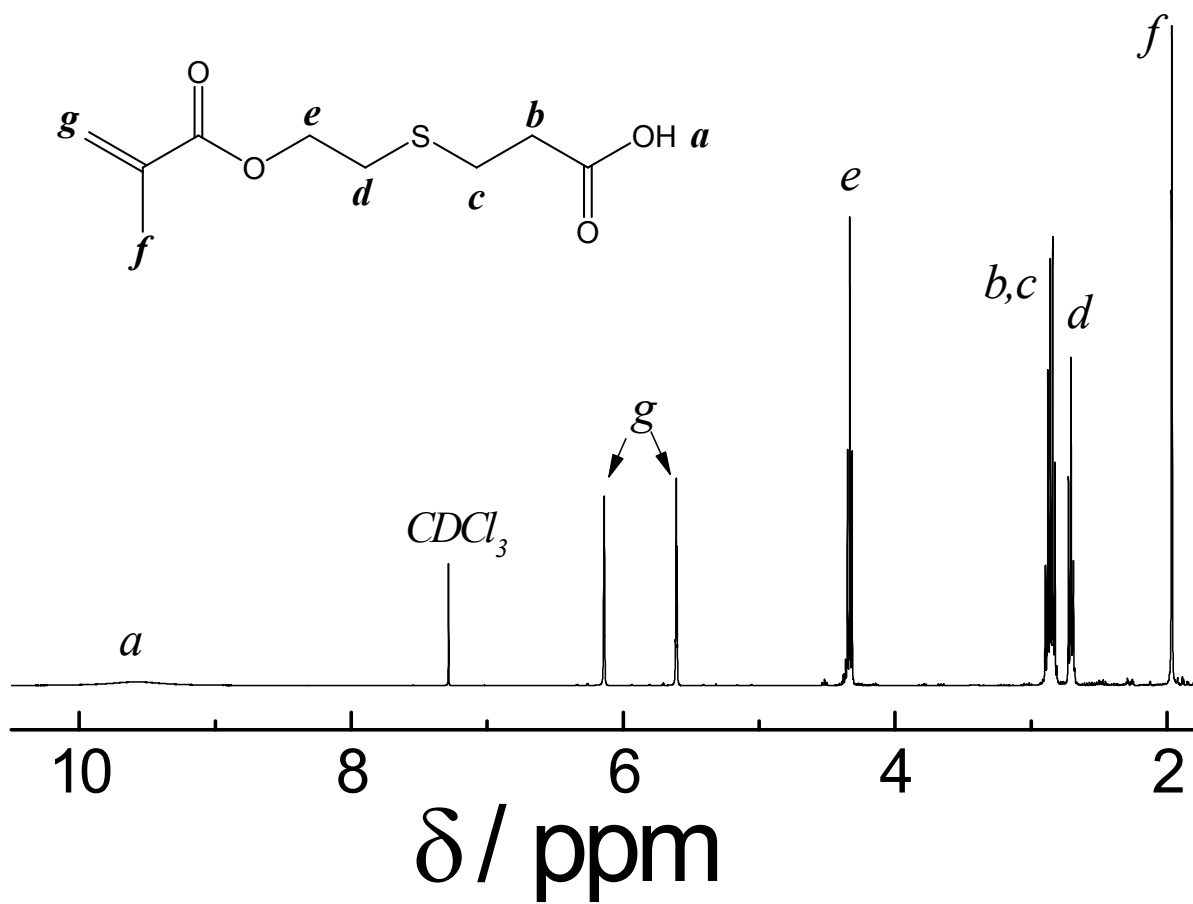

Fig. S5. <sup>1</sup>H NMR spectrum of BSMA in CDCl<sub>3</sub>.

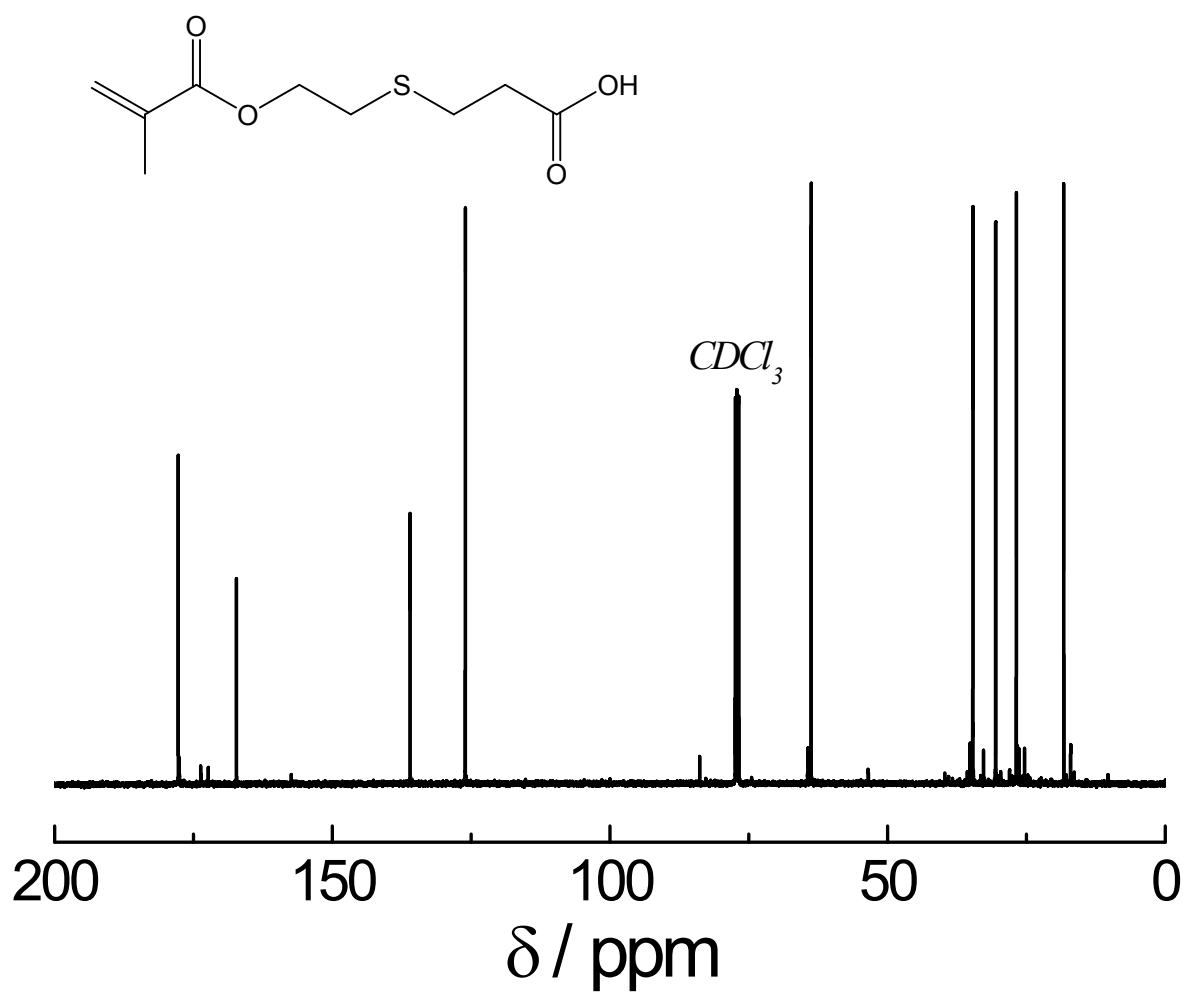

**Fig. S6.**  $^{13}\text{C}$  NMR spectrum of BSMA in  $\text{CDCl}_3$ .



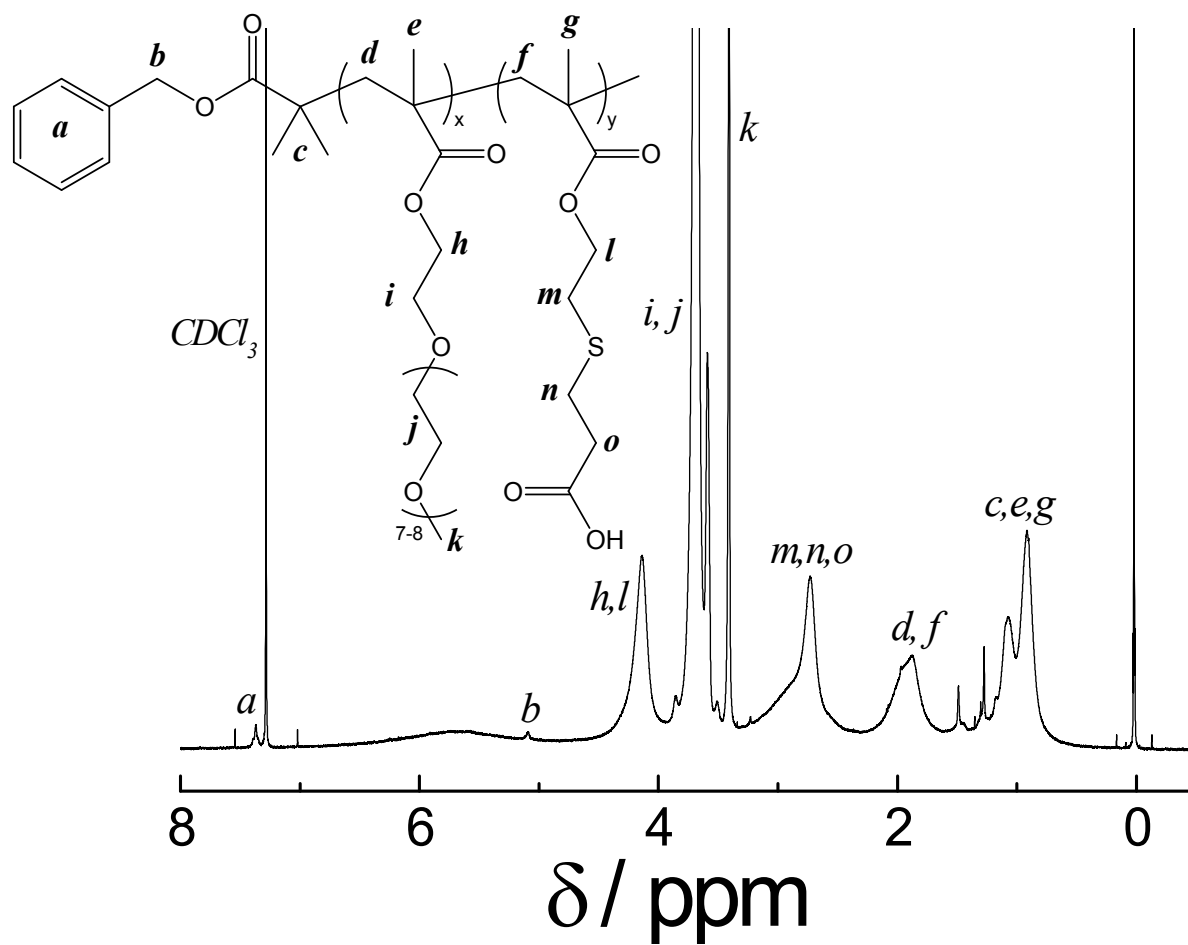

**Fig. S7.** <sup>1</sup>H NMR spectrum of P(OEGMA-co-BSMA) in CDCl<sub>3</sub>.

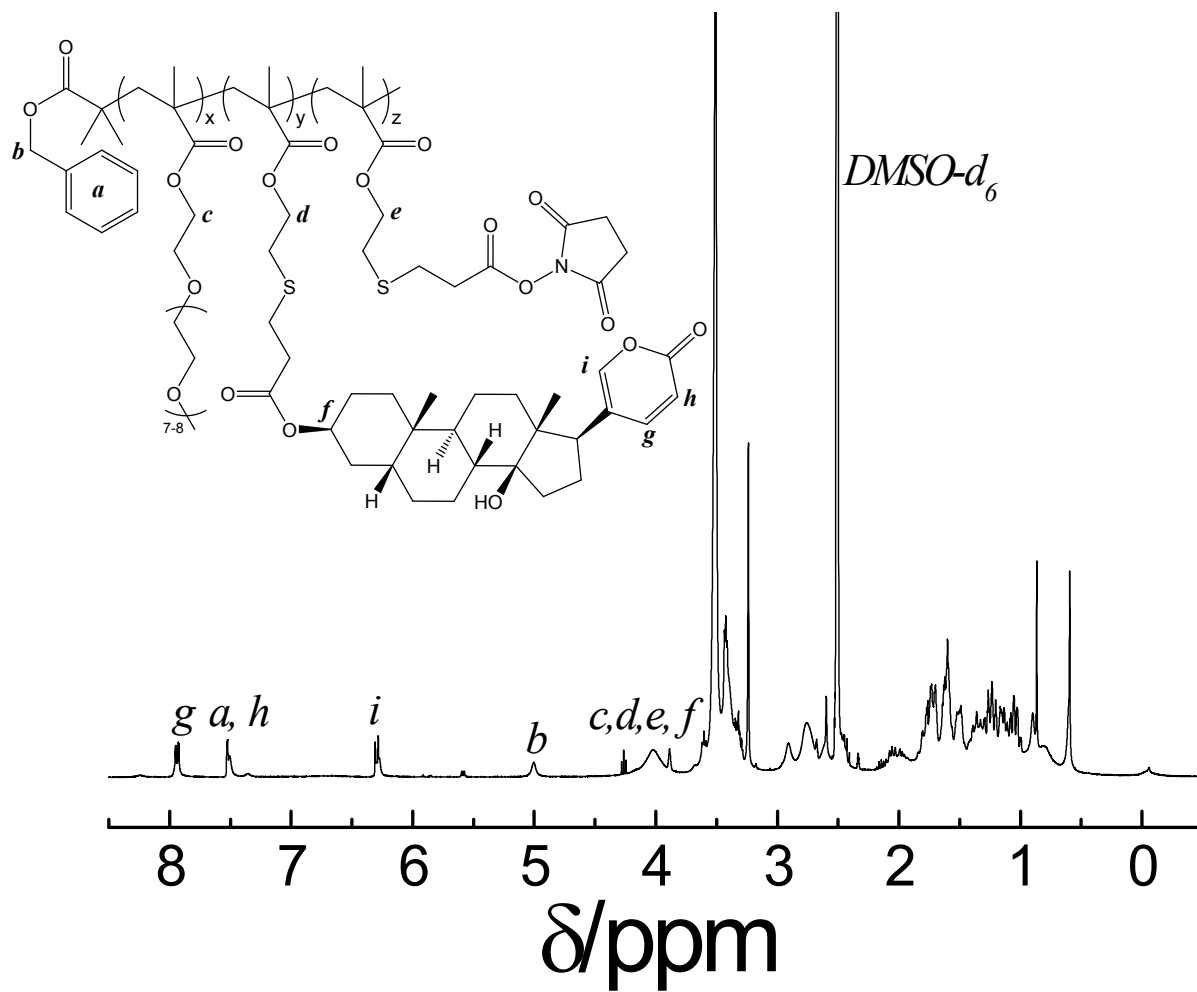

**Fig. S8.**  $^1\text{H}$  NMR spectrum of P(OEGMA-co-BUF) in  $\text{DMSO-}d_6$ .

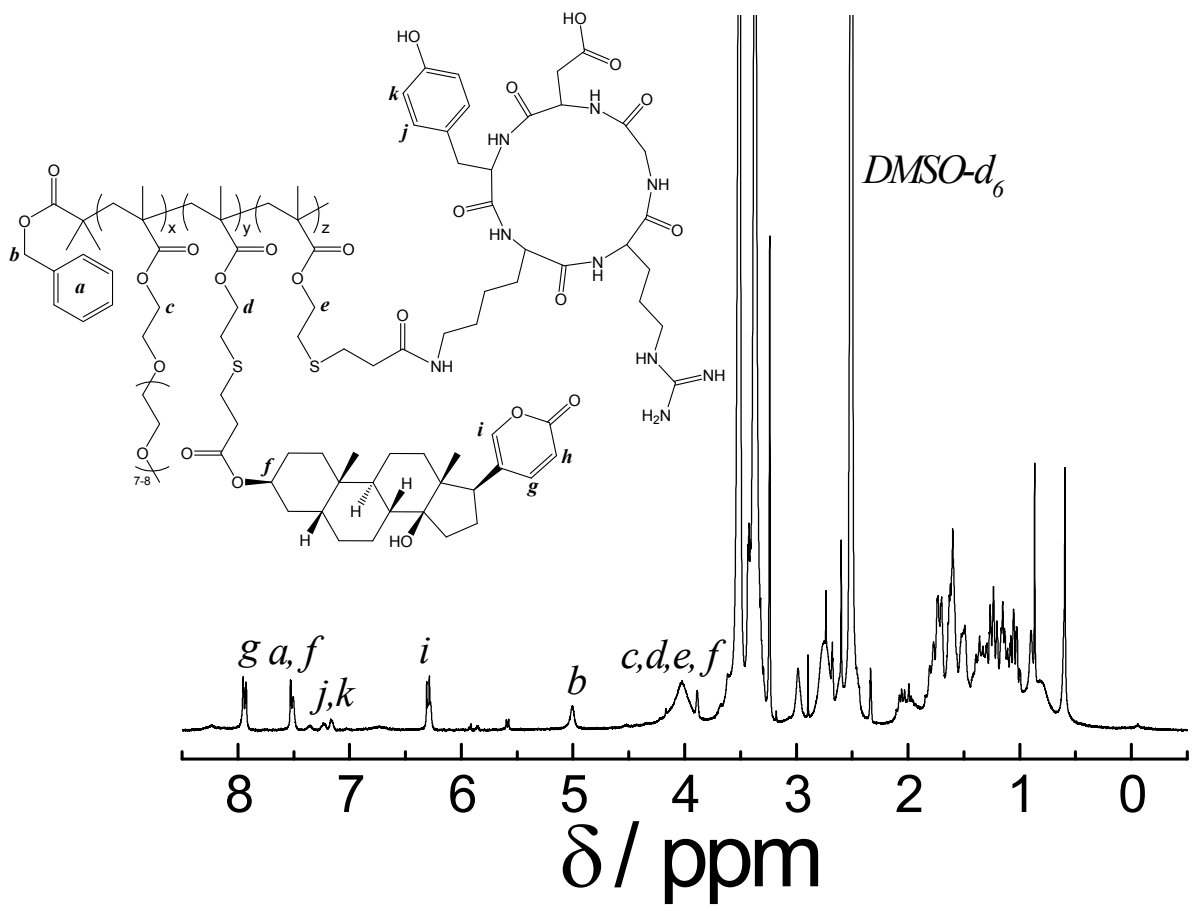

**Fig. S9.** <sup>1</sup>H NMR spectrum of P(OEGMA-co-BUF-co-RGD) in DMSO-d<sub>6</sub>.

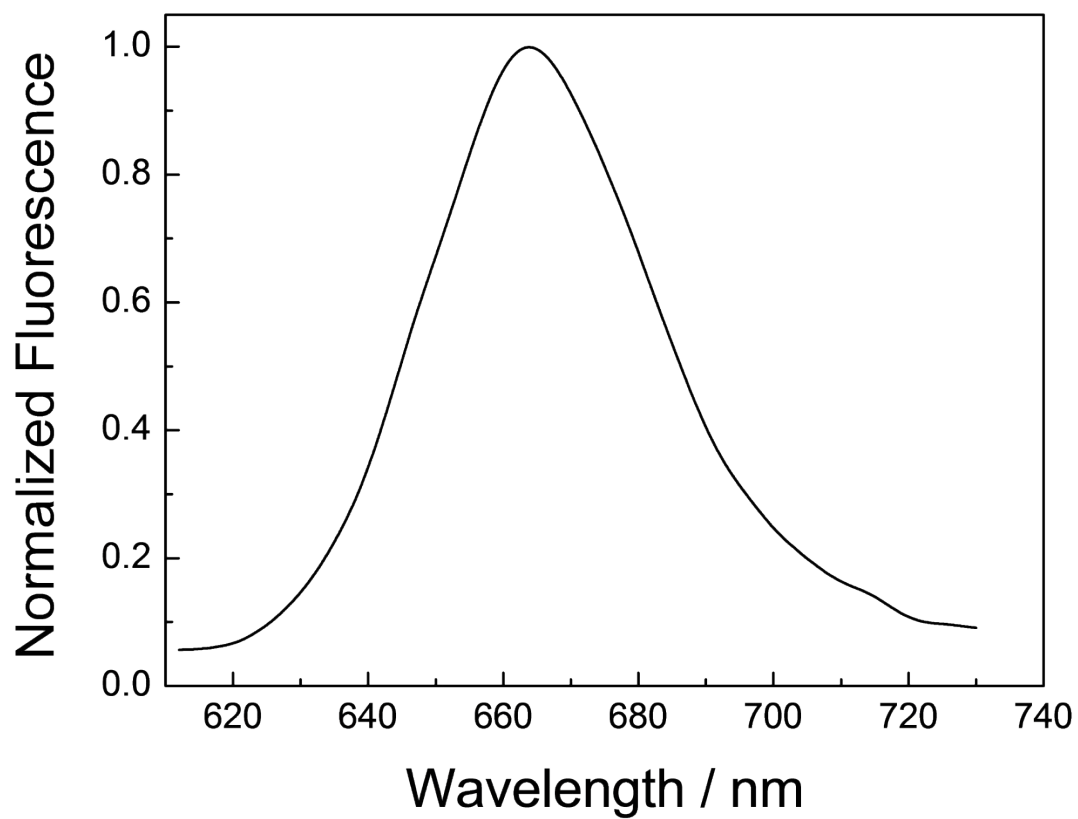

**Fig. S10.** Fluorescence emission spectrum recorded for the aqueous micellar solution of P(OEGMA-*co*-BUF-*co*-RGD-*co*-Cy5) ( $[\text{Cy5}] = 3.0 \times 10^{-6} \text{ M}$ ;  $\lambda_{\text{ex}} = 633 \text{ nm}$ ; slit widths: Ex. 5 nm, Em. 5 nm).

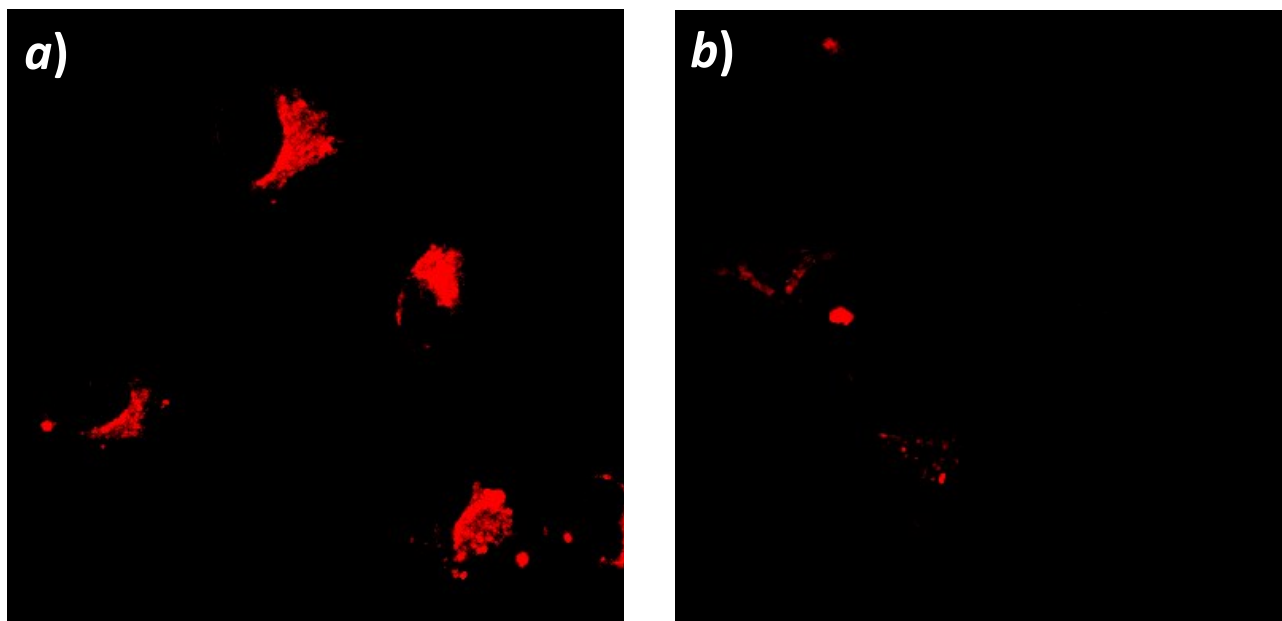

**Fig. S11.** Typical confocal microscopy fluorescence images recorded for LoVo cells after incubating at 37 °C with P(OEGMA-*co*-BUF-*co*-RGD-*co*-Cy5) ([Cy5] =  $3.0 \times 10^{-6}$  M) for 4 h (a) without and (b) with an excess of free RGD (20-fold equivalent of RGD in P(OEGMA-*co*-BUF-*co*-RGD-*co*-Cy5)) to block RGD-mediated endocytosis of nanoparticles.
